# Supplementary material for: Impact of lymph node status on the prognosis of female breast cancer patients who underwent immediate reconstruction after total mastectomy: A multi-institutional retrospective cohort study
Source: Research Square preprint supplement (doi:10.21203/rs.3.rs-7243918/v1), 2025-08-11
Supplement: Supplementary file 1 [file 536db1e5bc5d96c391bd9559.docx]

**Supplement Table S1** Surgery codes for the data item RX Summ--Surg Prim Site

| **Value** | **Label** |
| --- | --- |
| 30 | Subcutaneous mastectomy |
|  | A subcutaneous mastectomy, also called nipple sparing mastectomy, is the removal of breast tissue without the nipple and areolar complex or overlying skin. It is performed to facilitate immediate breast reconstruction. Cases coded 30 may be considered to have undergone breast reconstruction. |
|  | [SEER Note: Code Goldilocks mastectomy in Surgery of Primary Site (NAACCR # 1290). Breast  surgery code 30 seems to be the best available choice for "Goldilocks" mastectomy. It is essentially a  skin-sparing mastectomy with breast reconstruction. The choice between code 30 and codes in the 40-49 range depends on the extent of the breast removal. Review the operative report carefully and assign the code that best reflects the extent of the breast removal.] |
| 40 | Total (simple) mastectomy, NOS |
| 41 | Total (simple) mastectomy WITHOUT removal of uninvolved contralateral breast |
| 43 | Total (simple) mastectomy WITHOUT removal of uninvolved contralateral breast WITH reconstruction, NOS |
| 44 | Total (simple) mastectomy WITHOUT removal of uninvolved contralateral breast WITH reconstruction, tissue |
| 45 | Total (simple) mastectomy WITHOUT removal of uninvolved contralateral breast WITH reconstruction, implant |
| 46 | Total (simple) mastectomy WITHOUT removal of uninvolved contralateral breast WITH reconstruction, combined (tissue and implant) |
| 42 | Total (simple) mastectomy WITH removal of uninvolved contralateral breast |
| 47 | Total (simple) mastectomy WITH removal of uninvolved contralateral breast WITH reconstruction, NOS |
| 48 | Total (simple) mastectomy WITH removal of uninvolved contralateral breast WITH reconstruction, tissue |
| 49 | Total (simple) mastectomy WITH removal of uninvolved contralateral breast WITH reconstruction, implant |
| 75 | Total (simple) mastectomy WITH removal of uninvolved contralateral breast WITH reconstruction, combined (tissue and implant) |
|  | [SEER Note: “Tissue” for reconstruction is defined as human tissue such as muscle (latissimus dorsi or rectus abdominis) or skin in contrast to artificial prostheses (implants). Placement of a tissue expander at the time of original surgery indicates that reconstruction is planned as part of the first course of treatment.] |
|  | [SEER Note: Assign code 43 for a simple mastectomy with tissue expanders and acellular dermal matrix/AlloDerm. The tissue expander indicates preparation for reconstruction. The acellular dermal matrix/AlloDerm is not coded because, while they often accompany an implant procedure, they are not the principle element of reconstructive procedures. The principle elements would be tissue from the  patient and/or prosthetics (e.g., gel implants).] |
|  | A total (simple) mastectomy removes all breast tissue, the nipple, and the areolar complex. An axillary dissection is not done.For single primaries only, code removal of involved contralateral breast under the data item Surgical  Procedure of Other Site (NAACCR Item # 1294) |
|  | [SEER Note: Example of single primary with removal of involved contralateral breast--Inflammatory carcinoma involving both breasts. Bilateral simple mastectomies. Code Surgery of Primary Site(NAACCR # 1290) 41 and code Surgical Procedure of Other Site (NAACCR # 1294) 1.] |
|  | If contralateral breast reveals a second primary, each breast is abstracted separately. The surgical procedure is coded 41 for the first primary. The surgical code for the contralateral breast is coded to the procedure performed on that site. |
|  | [SEER Note: Placement of a tissue expander at the time of original surgery means that reconstruction is planned as part of the first course of treatment. When an expander is placed, code the mastectomy and reconstruction.] |
|  | Reconstruction that is planned as part of first course treatment is coded 43-49 or 75, regardless of whether it is done at the time of mastectomy or later. |
|  | [SEER Note: Reconstruction may be done at the same time as the mastectomy or may be done later. Code 43-49, or 75 if the operative report or medical record states reconstruction will be done later, or if a tissue expander is inserted during the mastectomy procedure. Tissue expander insertion precedes  reconstruction.] |
| 50 | Modified radical mastectomy, NOS |
| 51 | Modified radical mastectomy WITHOUT removal of uninvolved contralateral breast |
| 53 | Modified radical mastectomy WITHOUT removal of uninvolved contralateral breast WITH reconstruction, NOS |
| 54 | Modified radical mastectomy WITHOUT removal of uninvolved contralateral breast WITH reconstruction, tissue |
| 55 | Modified radical mastectomy WITHOUT removal of uninvolved contralateral breast WITH reconstruction, implant |
| 56 | Modified radical mastectomy WITHOUT removal of uninvolved contralateral breast WITH reconstruction, combined (tissue and implant) |
| 52 | Modified radical mastectomy WITH removal of uninvolved contralateral breast |
| 57 | Modified radical mastectomy WITH removal of uninvolved contralateral breast WITH reconstruction, NOS |
| 58 | Modified radical mastectomy WITH removal of uninvolved contralateral breast WITH reconstruction, tissue |
| 59 | Modified radical mastectomy WITH removal of uninvolved contralateral breast WITH reconstruction, implant |
| 63 | Modified radical mastectomy WITH removal of uninvolved contralateral breast WITH reconstruction, combined (tissue and implant) |
|  | Removal of all breast tissue, the nipple, the areolar complex, and variable amounts of breast skin in continuity with the axilla. The specimen may or may not include a portion of the pectoralis major muscle. |
|  | [SEER Note: “In continuity with” or “en bloc” means that all the tissues were removed during the same procedure, but not necessarily in a single specimen. “Tissue” for reconstruction is defined as human tissue such as muscle (latissimus dorsi or rectus abdominis) or skin in contrast to artificial prostheses (implants). Placement of a tissue expander at the time of original surgery indicates that reconstruction is planned as part of the first course of treatment.] |
|  | [SEER Note: Code the most invasive, extensive, or definitive surgery in Surgery of Primary Site (NAACCR # 1290).Assign code 51 or 52 if a patient has an excisional biopsy and axillary dissection followed by a simple mastectomy during the first course of therapy. Code the cumulative result of the surgeries, which is a  modified radical mastectomy in this case.] |
|  | If contralateral breast reveals a second primary, each breast is abstracted separately. The surgical procedure is coded 51 for the first primary. The surgical code for the contralateral breast is coded to the procedure performed on that site. |
|  | For single primaries only, code removal of involved contralateral breast under the data item Surgical Procedure of Other Site (NAACCR Item # 1294). |
| 60 | Radical mastectomy, NOS |
| 61 | Radical mastectomy WITHOUT removal of uninvolved contralateral breast |
| 64 | Radical mastectomy WITHOUT removal of uninvolved contralateral breast WITH reconstruction, NOS |
| 65 | Radical mastectomy WITHOUT removal of uninvolved contralateral breast WITH reconstruction, tissue |
| 66 | Radical mastectomy WITHOUT removal of uninvolved contralateral breast WITH reconstruction, implant |
| 67 | Radical mastectomy WITHOUT removal of uninvolved contralateral breast WITH reconstruction, combined (tissue and implant) |
| 62 | Radical mastectomy WITH removal of uninvolved contralateral breast |
| 68 | Radical mastectomy WITH removal of uninvolved contralateral breast WITH reconstruction, NOS |
| 69 | Radical mastectomy WITH removal of uninvolved contralateral breast WITH reconstruction, tissue |
| 73 | Radical mastectomy WITH removal of uninvolved contralateral breast WITH reconstruction, implant |
| 74 | Radical mastectomy WITH removal of uninvolved contralateral breast WITH reconstruction, combined (tissue and implant) |
|  | [SEER Note: Involves removal of breast tissue, nipple, areolar complex, variable amount of skin,  pectoralis minor, and/or pectoralis major, as well as en bloc axillary dissection. “Tissue” for  reconstruction is defined as human tissue such as muscle (latissimus dorsi or rectus abdominis) or skin in contrast to artificial prostheses (implants). Placement of a tissue expander at the time of original surgery indicates that reconstruction is planned as part of the first course of treatment.] |

**Supplement Table S2**Pathology types included and group division

| Pathology code | Count | Group |
| --- | --- | --- |
| 8500/3: Infiltrating duct carcinoma, NOS | 5870 | Ductal carcinoma |
| 8523/3: Infiltrating duct mixed with other types of carcinoma | 233 | Ductal carcinoma |
| 8507/3: Ductal carcinoma, micropapillary | 50 | Ductal carcinoma |
| 8541/3: Paget disease and infiltrating ductal carcinoma of breast | 20 | Ductal carcinoma |
| 8211/3: Tubular adenocarcinoma | 8 | Ductal carcinoma |
| 8503/3: Intraductal papillary adenocarcinoma with invasion | 8 | Ductal carcinoma |
| 8521/3: Infiltrating ductular carcinoma | 3 | Ductal carcinoma |
| 8543/3: Paget disease and intraductal carcinoma | 3 | Ductal carcinoma |
| 8502/3: Secretory carcinoma of breast | 1 | Ductal carcinoma |
| 8504/3: Intracystic carcinoma, NOS | 1 | Ductal carcinoma |
| 8520/3: Lobular carcinoma, NOS | 1307 | Lobular carcinoma |
| 8524/3: Infiltrating lobular mixed with other types of carcinoma | 41 | Lobular carcinoma |
| 8522/3: Infiltrating duct and lobular carcinoma | 712 | Ductal and lobular carcinoma |
| 8480/3: Mucinous adenocarcinoma | 53 | Other |
| 8575/3: Metaplastic carcinoma, NOS | 30 | Other |
| 8010/3: Carcinoma, NOS | 19 | Other |
| 8140/3: Adenocarcinoma, NOS | 12 | Other |
| 8510/3: Medullary carcinoma, NOS | 12 | Other |
| 8401/3: Apocrine adenocarcinoma | 10 | Other |
| 8050/3: Papillary carcinoma, NOS | 5 | Other |
| 8201/3: Cribriform carcinoma, NOS | 4 | Other |
| 8230/3: Solid carcinoma, NOS | 3 | Other |
| 8255/3: Adenocarcinoma with mixed subtypes | 2 | Other |
| 8574/3: Adenocarcinoma with neuroendocrine differentiation | 2 | Other |
| 8022/3: Pleomorphic carcinoma | 1 | Other |
| 8041/3: Small cell carcinoma, NOS | 1 | Other |
| 8070/3: Squamous cell carcinoma, NOS | 1 | Other |
| 8071/3: Squamous cell carcinoma, keratinizing, NOS | 1 | Other |
| 8200/3: Adenoid cystic carcinoma | 1 | Other |
| 8246/3: Neuroendocrine carcinoma, NOS | 1 | Other |
| 8251/3: Alveolar adenocarcinoma | 1 | Other |
| 8560/3: Adenosquamous carcinoma | 1 | Other |
| 8570/3: Adenocarcinoma with squamous metaplasia | 1 | Other |
| SUM | 8418 |  |

**Supplement Table 3** The Cox regression analysis of OS and BCSS related risk factors in patients receiving IBR before PSM (n = 8418).

| **Variables** | **Number of patients (%)** | **OS** | |  | **BCSS** | |
| --- | --- | --- | --- | --- | --- | --- |
| **HR (uni)** | **HR (multi)** |  | **HR (uni)** | **HR (multi)** |
| **Age** |  |  |  |  |  |  |
| 18-34y | 653 (7.8%) | 1(Referent) | 1(Referent) |  | 1(Referent) | 1(Referent) |
| 35-59y | 6272 (74.5%) | 0.71 (0.59-0.85, p<0.001) | 0.84 (0.70-1.02, p=0.082) |  | 0.67 (0.55-0.81, p<0.001) | 0.81 (0.67-0.99, p=0.036) * |
| 60-69y | 1493 (17.7%) | 0.86 (0.70-1.07, p=0.170) | 1.09 (0.87-1.36, p=0.459) |  | 0.70 (0.55-0.87, p=0.002) | 0.89 (0.70-1.14, p=0.363) |
| **Marital status** |  |  |  |  |  |  |
| Single | 1348 (16.0%) | 1(Referent) | 1(Referent) |  | 1(Referent) | 1(Referent) |
| Separated | 1219 (14.5%) | 0.86 (0.72-1.04, p=0.123) | 0.92 (0.76-1.11, p=0.391) |  | 0.87 (0.71-1.06, p=0.160) | 0.96 (0.78-1.18, p=0.688) |
| Married | 5851 (69.5%) | 0.74 (0.64-0.86, p<0.001) | 0.83 (0.71-0.96, p=0.013) * |  | 0.77 (0.66-0.90, p<0.001) | 0.88 (0.75-1.03, p=0.104) |
| **Race and origin** |  |  |  |  |  |  |
| Non-Hispanic White | 5889 (70.0%) | 1(Referent) | 1(Referent) |  | 1(Referent) | 1(Referent) |
| Non-Hispanic Black | 819 (9.7%) | 1.58 (1.34-1.86, p<0.001) | 1.28 (1.08-1.52, p=0.005) ** |  | 1.57 (1.32-1.87, p<0.001) | 1.26 (1.04-1.51, p=0.016) * |
| Hispanic (All Races) | 1004 (11.9%) | 1.25 (1.06-1.48, p=0.009) | 1.17 (0.99-1.39, p=0.072) |  | 1.29 (1.08-1.54, p=0.005) | 1.18 (0.98-1.41, p=0.074) |
| Other | 706 (8.4%) | 0.88 (0.70-1.09, p=0.241) | 0.94 (0.75-1.17, p=0.573) |  | 0.92 (0.73-1.16, p=0.492) | 0.97 (0.76-1.23, p=0.788) |
| **Median household income** |  |  |  |  |  |  |
| <$50,000 | 184 (2.2%) | 1(Referent) | 1(Referent) |  | 1(Referent) | 1(Referent) |
| $50,000-$69,999 | 2069 (24.6%) | 0.82 (0.59-1.14, p=0.234) | 0.83 (0.59-1.15, p=0.257) |  | 0.78 (0.55-1.10, p=0.153) | 0.78 (0.55-1.10, p=0.159) |
| $70,000-$89,999 | 3492 (41.5%) | 0.64 (0.46-0.88, p=0.007) | 0.66 (0.47-0.92, p=0.013) * |  | 0.64 (0.45-0.90, p=0.011) | 0.66 (0.47-0.93, p=0.019) * |
| ≥$90,000 | 2673 (31.8%) | 0.57 (0.41-0.80, p<0.001) | 0.61 (0.44-0.86, p=0.004) ** |  | 0.56 (0.40-0.80, p=0.001) | 0.60 (0.42-0.86, p=0.005) ** |
| **HR status** |  |  |  |  |  |  |
| Negative | 1211 (14.4%) | 1(Referent) | 1(Referent) |  | 1(Referent) | 1(Referent) |
| Positive | 7207 (85.6%) | 0.45 (0.40-0.51, p<0.001) | 0.53 (0.46-0.61, p<0.001) *** |  | 0.42 (0.36-0.47, p<0.001) | 0.49 (0.42-0.57, p<0.001) *** |
| **HER2 status** |  |  |  |  |  |  |
| Negative | 6944 (82.5%) | 1(Referent) | 1(Referent) |  | 1(Referent) | 1(Referent) |
| Positive | 1474 (17.5%) | 0.71 (0.60-0.83, p<0.001) | 0.51 (0.43-0.60, p<0.001) *** |  | 0.69 (0.58-0.82, p<0.001) | 0.48 (0.40-0.57, p<0.001) *** |
| **Grade** |  |  |  |  |  |  |
| Grade I | 957 (11.4%) | 1(Referent) | 1(Referent) |  | 1(Referent) | 1(Referent) |
| Grade II | 4095 (48.6%) | 1.40 (1.10-1.77, p=0.006) | 1.27 (1.00-1.62, p=0.048) * |  | 1.47 (1.13-1.92, p=0.004) | 1.33 (1.02-1.74, p=0.036) * |
| Grade III-IV | 3366 (40.0%) | 2.72 (2.16-3.43, p<0.001) | 2.15 (1.68-2.76, p<0.001) *** |  | 3.09 (2.39-4.00, p<0.001) | 2.34 (1.78-3.07, p<0.001) *** |
| **Pathology** |  |  |  |  |  |  |
| Ductal carcinoma | 6197 (73.6%) | 1(Referent) | 1(Referent) |  | 1(Referent) | 1(Referent) |
| Lobular carcinoma | 1348 (16.0%) | 0.88 (0.76-1.03, p=0.125) | 1.02 (0.85-1.22, p=0.830) |  | 0.85 (0.72-1.01, p=0.068) | 1.05 (0.86-1.27, p=0.651) |
| Ductal and lobular carcinoma | 712 (8.5%) | 0.71 (0.56-0.89, p=0.003) | 0.81 (0.64-1.03, p=0.084) |  | 0.66 (0.51-0.85, p=0.001) | 0.79 (0.61-1.02, p=0.075) |
| Other | 161 (1.9%) | 1.36 (0.96-1.92, p=0.082) | 1.31 (0.93-1.86, p=0.127) |  | 1.44 (1.01-2.07, p=0.044) | 1.38 (0.96-1.98, p=0.082) |
| **T stage** |  |  |  |  |  |  |
| T0-T1 | 2619 (31.1%) | 1(Referent) | 1(Referent) |  | 1(Referent) | 1(Referent) |
| T2 | 3848 (45.7%) | 1.67 (1.45-1.94, p<0.001) | 1.38 (1.19-1.60, p<0.001) *** |  | 1.81 (1.55-2.12, p<0.001) | 1.46 (1.24-1.71, p<0.001) *** |
| T3 | 1951 (23.2%) | 2.25 (1.92-2.63, p<0.001) | 1.98 (1.68-2.33, p<0.001) *** |  | 2.39 (2.02-2.84, p<0.001) | 2.07 (1.74-2.47, p<0.001) *** |
| **N stage** |  |  |  |  |  |  |
| N0 | 1684 (20.0%) | 1(Referent) | 1(Referent) |  | 1(Referent) | 1(Referent) |
| N1 | 4451 (52.9%) | 1.43 (1.20-1.71, p<0.001) | 1.53 (1.27-1.84, p<0.001) *** |  | 1.43 (1.18-1.74, p<0.001) | 1.50 (1.23-1.83, p<0.001) *** |
| N2 | 1553 (18.4%) | 2.42 (2.00-2.93, p<0.001) | 2.48 (2.02-3.03, p<0.001) *** |  | 2.61 (2.12-3.20, p<0.001) | 2.62 (2.11-3.25, p<0.001) *** |
| N3 | 730 (8.7%) | 4.15 (3.39-5.08, p<0.001) | 4.03 (3.26-4.99, p<0.001) *** |  | 4.35 (3.50-5.40, p<0.001) | 4.12 (3.28-5.18, p<0.001) *** |
| **Removal of uninvolved contralateral breast** |  |  |  |  |  |  |
| No | 3897 (46.3%) | 1(Referent) | 1(Referent) |  | 1(Referent) | 1(Referent) |
| Yes | 4521 (53.7%) | 0.98 (0.88-1.09, p=0.696) | - |  | 1.02 (0.91-1.15, p=0.743) | - |
| **Autologous tissue or implant based** |  |  |  |  |  |  |
| Tissue | 2290 (27.2%) | 1(Referent) | 1(Referent) |  | 1(Referent) | 1(Referent) |
| Implant | 3571 (42.4%) | 0.86 (0.75-0.98, p=0.027) | 0.90 (0.78-1.02, p=0.108) |  | 0.86 (0.75-0.99, p=0.039) | 0.90 (0.78-1.04, p=0.160) |
| Mixed or unknown | 2557 (30.4%) | 0.88 (0.76-1.01, p=0.074) | 0.93 (0.81-1.08, p=0.342) |  | 0.89 (0.76-1.04, p=0.132) | 0.95 (0.81-1.11, p=0.499) |
| **Chemotherapy status** |  |  |  |  |  |  |
| No/Unknown | 1181 (14.0%) | 1(Referent) | 1(Referent) |  | 1(Referent) | 1(Referent) |
| Yes | 7237 (86.0%) | 2.34 (1.87-2.93, p<0.001) | 1.18 (0.93-1.51, p=0.181) |  | 2.97 (2.27-3.88, p<0.001) | 1.39 (1.04-1.84, p=0.024) * |
| **Radiotherapy status** |  |  |  |  |  |  |
| No | 405 (4.8%) | 1(Referent) | 1(Referent) |  | 1(Referent) | 1(Referent) |
| Yes | 8013 (95.2%) | 0.97 (0.74-1.25, p=0.794) | - |  | 1.10 (0.82-1.48, p=0.532) | - |
| **Note:** *<0.05，**<0.01，***<0.001 | | | | | | |
